# Supplementary material for: Preparation and catalytic properties of polydopamine-modified polyacrylonitrile fibers functionalized with silver nanoparticles
Source: Royal Society of Chemistry journal article supplement (doi:10.1039/d2ra03845e), 2022-01-01
Supplement: d2ra03845e1.pdf [file d2ra03845e1.pdf]

## Supplementary Information

### Preparation and catalytic properties of polydopamine-modified polyacrylonitrile fibers functionalized with silver nanoparticles

Xiaoyu Zhu <sup>a</sup>, Huiying Liu <sup>\*a</sup>, Yingying Wu <sup>a</sup>, Jing Ye <sup>a</sup>, Yacheng Li <sup>a</sup> and Zhendong Liu<sup>\* a</sup>

<sup>a</sup> College of Material Design and Engineering, Beijing Institute of Fashion Technology, Beijing 10029, P. R. China

Fax: +86-10-64288045; Tel: +86-10-64288045

E-mail: 20140006@bift.edu.cn; clylzd@bift.edu.cn

1. Table S1. Effects of functionalized fibers wrapped with different concentrations of dopamine on the catalytic reaction

| The concentration of PDA solution(g/L) | The concentration of AgNO <sub>3</sub> solution(g/L) | n <sub>4-NP</sub> : n <sub>NaBH<sub>4</sub></sub> | Amount of cat. (mg) | solvent          | T (°C) | t (min) | Yield (%) |
|----------------------------------------|------------------------------------------------------|---------------------------------------------------|---------------------|------------------|--------|---------|-----------|
| 0                                      | 1                                                    | 1:10                                              | 40                  | H <sub>2</sub> O | 35     | 30      | 14.7%     |
| 0.1                                    | 1                                                    | 1:10                                              | 40                  | H <sub>2</sub> O | 35     | 30      | 25.0%     |
| 0.5                                    | 1                                                    | 1:10                                              | 40                  | H <sub>2</sub> O | 35     | 30      | 95.2%     |
| 1.0                                    | 1                                                    | 1:10                                              | 40                  | H <sub>2</sub> O | 35     | 30      | 97.0%     |
| 2.0                                    | 1                                                    | 1:10                                              | 40                  | H <sub>2</sub> O | 35     | 30      | 95.1%     |

2. Table S2 Reaction activity of sodium borohydride reduced 4-NP catalyzed by fibers with different functional fiber dosage

| Silver load | n <sub>4-NP</sub> : n <sub>NaBH<sub>4</sub></sub> | Amount of cat. (mg) | solvent          | T (°C) | t (min) | Yield (%) |
|-------------|---------------------------------------------------|---------------------|------------------|--------|---------|-----------|
| 0.68%       | 1:10                                              | 5                   | H <sub>2</sub> O | 35     | -       | -         |
| 0.68%       | 1:10                                              | 10                  | H <sub>2</sub> O | 35     | -       | -         |
| 0.68%       | 1:10                                              | 20                  | H <sub>2</sub> O | 35     | 60      | 69        |
| 0.68%       | 1:10                                              | 30                  | H <sub>2</sub> O | 35     | 60      | 93        |
| 0.68%       | 1:10                                              | 40                  | H <sub>2</sub> O | 35     | 17      | 97        |

3. Table S3. Exploring catalyst composition for catalytic reduction of nitrophenol

| Composition of catalyst     | $n_{4-NP} : n_{NaBH_4}$ | solvent          | T (°C) | t (min) | material | product |
|-----------------------------|-------------------------|------------------|--------|---------|----------|---------|
| Ag                          | 1:10                    | H <sub>2</sub> O | 35     | 30min   | 98%      | -       |
| Ag + NaBH <sub>4</sub>      | 1:10                    | H <sub>2</sub> O | 35     | 30min   | -        | 90%     |
| PAN-PDA + NaBH <sub>4</sub> | 1:10                    | H <sub>2</sub> O | 35     | 30min   | 93%      | -       |
| NaBH <sub>4</sub>           | 1:10                    | H <sub>2</sub> O | 35     | 90min   | 95%      | -       |

4. Table S4 Effects of the repetitive use of PAN-S-PDA-Ag catalyst on the reduction reaction

| 1       |           | 2       |           | 3       |           | 4       |           | 5       |           |
|---------|-----------|---------|-----------|---------|-----------|---------|-----------|---------|-----------|
| t (min) | Yield (%) |
| 13      | 96        | 40      | 95        | 26      | 92        | 47      | 99        | 32      | 99        |
| 13      | 92        | 23      | 95        | 42      | 91        | 207     | 97        | 37      | 95        |
| 13      | 78        | 30      | 95        | 67      | 96        | 177     | 91        | 37      | 97        |
| 6       |           | 7       |           | 8       |           | 9       |           | 10      |           |
| t (min) | Yield (%) |
| 23      | 86        | 24      | 97        | 29      | 98        | 37      | 99        | 54      | 99        |
| 32      | 98        | 24      | 98        | 24      | 87        | 25      | 99        | 25      | 96        |
| 17      | 99        | 24      | 97        | 46      | 98        | 41      | 97        | 25      | 98        |

5. Figure S1 The cross section SEM of PAN-PDA

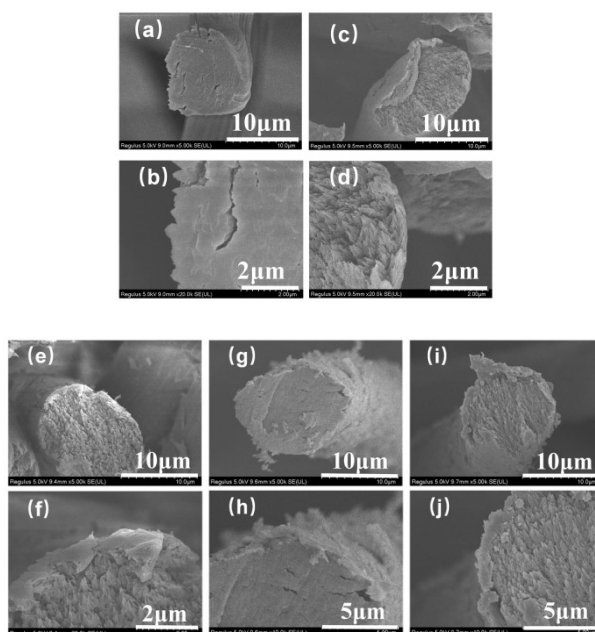

Figure S1 SEM images of the cross section of PAN fiber modified by different concentration of dopamine solution (a, b) 0 g/L (c, d) 0.1 g/L (e, f) 0.5 g/L (g, h) 1 g/L (i, j) 2 g/L

6. SEM images of the PAN-PDA-Ag used as catalyst after 10 cycles

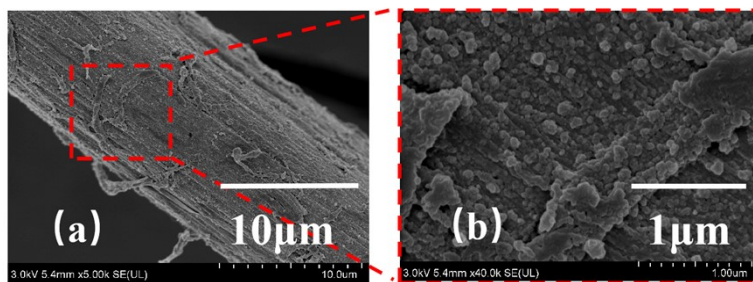

Figure S2 SEM images of the used PAN-PDA-Ag used as catalyst for 10 cycles
